# Supplementary material for: Metal organic framework-derived hollow cactus-like carbon sheets for oxygen reduction
Source: Royal Society of Chemistry journal article supplement (doi:10.1039/c9ta06609h), 2019-01-01
Supplement: c9ta06609h1.pdf [file c9ta06609h1.pdf]

## Supporting Information

### **Metal organic frameworks-derived hollow cactus-like carbon sheet for oxygen reduction**

Ming Zhang, Chaohai Wang, Xin Yan, Klu Prosper Kwame, Saisai Chen, Chengming Xiao,  
Junwen Qi, Xiuyun Sun, Lianjun Wang, Jiansheng Li\*

Jiangsu Key Laboratory of Chemical Pollution Control and Resources Reuse, School of Environmental and  
Biological Engineering, Nanjing University of Science and Technology, Nanjing 210094, People's Republic  
of China

lijsh@njust.edu.cn.

## **Materials and Methods:**

### **Materials:**

2-methylimidazole (2-MeIm),  $\text{Co}(\text{NO}_3)_3 \cdot 6\text{H}_2\text{O}$ ,  $\text{Zn}(\text{NO}_3)_2 \cdot 6\text{H}_2\text{O}$ , dopamine hydrochloride (PDA), potassium hydroxide (KOH) and nafion were purchased from Sigma-Aldrich. Anhydrous ethanol and sulfuric acid ( $\text{H}_2\text{SO}_4$ ) were obtained from Nanjing Chemical Reagent Co., Ltd. All the reagents were directly used without further purification. Deionized (DI) water was used all the experiments.

**Synthesis of leaf-like ZIFs.** In a typical experiment, 5.0 g of 2-MeIm was added to 100 mL of DI water with stirring for 10 min. Then 1.32 g of  $\text{Zn}(\text{NO}_3)_2 \cdot 6\text{H}_2\text{O}$  and 0.33 of  $\text{Co}(\text{NO}_3)_2 \cdot 6\text{H}_2\text{O}$  dissolved in 100 mL solution was added into the above solution with stirring for 3 h at room temperature. The resultant purple precipitate was collected by centrifugation with 3000 r/min for 5 min and washed with DI water and ethanol for three times, respectively. Finally, the purple powder was dried under vacuum 6 h at 80 °C.

**Synthesis of ZIFs@PDA.** In a typical synthesis. 5.0 g of 2-MeIm was added to 100 mL of DI water with stirring for 10 min. Then 1.32 g of  $\text{Zn}(\text{NO}_3)_2 \cdot 6\text{H}_2\text{O}$  and 0.33 of  $\text{Co}(\text{NO}_3)_2 \cdot 6\text{H}_2\text{O}$  dissolved in 100 mL solution was added into the above solution with stirring for 3 h at room temperature. 0.25 g of PDA dissolved in 20 mL of DI water was added into above solution for another 8 h at room temperature. The resultant black precipitate was collected by centrifugation with 2000 r/min for 5 min and washed with DI water and ethanol for three times, respectively. After drying, composite ZIFs@PDA was obtained. The composites 0.5-ZIFs@PDA and 0.75-ZIFs@PDA were obtained using the same method except PDA was 0.5 and 0.75 g, respectively.

**Synthesis of ZIFs-9, 0.25/0.75-CS/CNTs-9 and 0.5-CS/CNTs-7/8/9/10.** 0.5-CS/CNTs-7/8/9/10 were prepared by directly carbonizing 0.5-ZIFs@PDA precursor in  $\text{N}_2$  atmosphere at different temperature 700, 800, 900 and 1000 °C, respectively. ZIFs-9 and 0.25/0.75-CS/CNTs-9 were obtained by carbonizing the corresponding precursors in  $\text{N}_2$  atmosphere at 900 °C. The resultant samples were acid etching for 24 h to remove the unstable cobalt nanoparticles.

**Characterization:** The structure and morphology of samples were confirmed by TEM (FEI T20), STEM (Tecnai G2 F30 S-TWIN), SEM (FEI 250 and JEOL 7800). The composition was investigated by XRD (BRUKER D8, Cu  $\text{K}\alpha$ ) at 40 kV and 40 mA ( $\lambda = 1.5418\text{\AA}$ ). The  $\text{N}_2$  adsorption and desorption isotherms were obtained from Micromeritics ASAP-2020

instrument. X-ray photoelectron spectroscopy (XPS) spectra were obtained by using a PHI Quantera II ESCA System with Al K $\alpha$  radiation at 1486.8V. Raman spectroscopy was conducted at Renishaw in Via reflex spectrometer system. Thermal investigations are studied by thermogravimetric analysis (TGA, SDT Q600, USA) from 25 to 900 °C under Ar with a heating rate of 10 °C/min. GC-MS experiments were conducted on an Agilent Technologies 7980 GC equipped with 5975 MS. The chromatographic separations were conducted using an HP-5 MS capillary column (30 m  $\times$  0.25 mm. i. d.  $\times$  0.25 $\mu$ m).

**Electrochemical Measurement.** The electrochemical measurement of ZIFs-9, 0.25/0.75-CS/CNTs-9, 0.5-CS/CNTs-7/8/9/10 and Pt/C for ORR were carried out in a three-electrode cell (CHI 760E, CH Instrument, Shanghai). The Ag/AgCl electrode (3 M KCl), platinum sheet and sample-modified glassy carbon were the reference, counter electrode and working electrode, respectively. The working electrode was prepared according to previous literature. 10 mg of catalyst was dispersed in 2 mL of mixed solution of ethanol/water (70/30) and ultrasonic dispersion for 15 min. Then the rotary disk electrode (diameter 5 mm) was covered with 75  $\mu$ L of catalyst dispersion. After drying, 7.5  $\mu$ L of nafion solution (10% in ethanol) as the binder was dripped on the surface of catalyst. Finally, the prepared electrode was dried at 50°C for 3 h. Cyclic voltammetry (CV) tests were measured from 0.1 to 1.1 V versus reversible hydrogen electrode (RHE) in N<sub>2</sub>/O<sub>2</sub>-saturated 0.1 M KOH aqueous solution (the scan rate: 10 mV s<sup>-1</sup>). Linear sweep voltammogram (LSV) tests were carried out under different rotations in a N<sub>2</sub>/O<sub>2</sub>-saturated 0.1 M KOH electrolyte (scan rate: 10 mV s<sup>-1</sup>). Current–time (*I–t*) tests were performed at the rotation rate of 1600 rpm in a 0.1 M KOH aqueous solution. electrochemical impedance spectroscopy (EIS) were measured in the frequency range of 0.01–100 0000 Hz with 5 mV alternating current amplitude.

The electron transfer numbers (*n*) were obtained according to the Koutecky–Levich (*K–L*) equation, as follows:

$$\frac{1}{j} = \frac{1}{j_k} + \frac{1}{B\omega^{1/2}} \quad (1)$$

$$n = \frac{B}{0.2F(D_0)^{2/3}(V)^{-1/6}C_0} \quad (2)$$

$$j_k = nFkC_0 \quad (3)$$

where  $j$  and  $j_k$  correspond to measured and kinetic-limited current densities, respectively;  $B$  can be determined from the slope of the K-L plots;  $\omega$  is the rotation rate (rpm);  $F$  is the Faraday constant ( $96485 \text{ C mol}^{-1}$ );  $D_0$  is the diffusion coefficient of oxygen ( $1.9 \times 10^{-5} \text{ cm}^2 \text{ s}^{-1}$ , 0.1 M KOH);  $V$  is the kinematic viscosity of the electrolyte ( $0.01 \text{ cm}^2 \text{ s}^{-1}$ , 0.1 M KOH);  $C_0$  is the concentration of oxygen ( $1.22 \times 10^{-6} \text{ mol cm}^{-3}$ ).

The rotating ring-disk electrode (RRDE) runs at 1600 rpm with a scan rate of  $10 \text{ mV s}^{-1}$ , and the hydrogen peroxide yield (%H<sub>2</sub>O<sub>2</sub>) is calculated by the following equation:

$$\%H_2O_2 = 200 \frac{I_r/N}{I_d + I_r/N}$$

where  $I_d$  and  $I_r$  are the disk and ring current, respectively.  $N$  is the ring current collection efficiency which is determined to be about 0.35 in a 10 mM K<sub>3</sub>[Fe(CN)<sub>6</sub>] and 0.1 M KNO<sub>3</sub> solution.

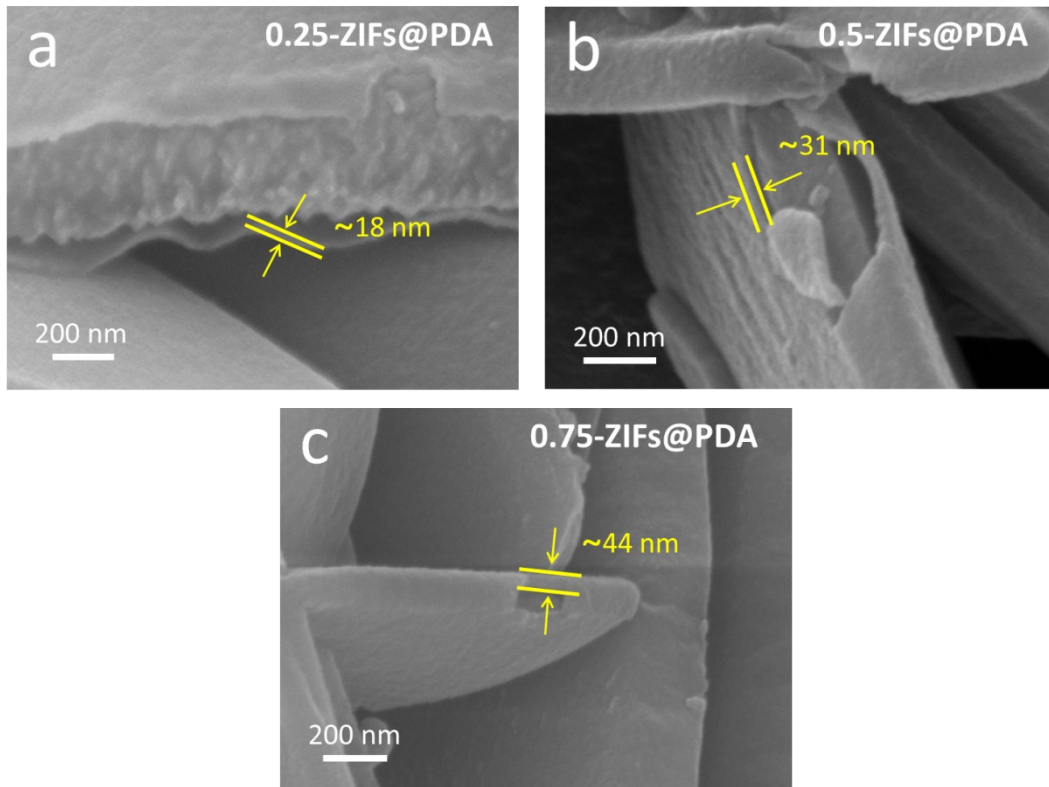

Fig. S1 The thickness of PDA layer for 0.25/0.5/0.75-ZIFs@PDA.

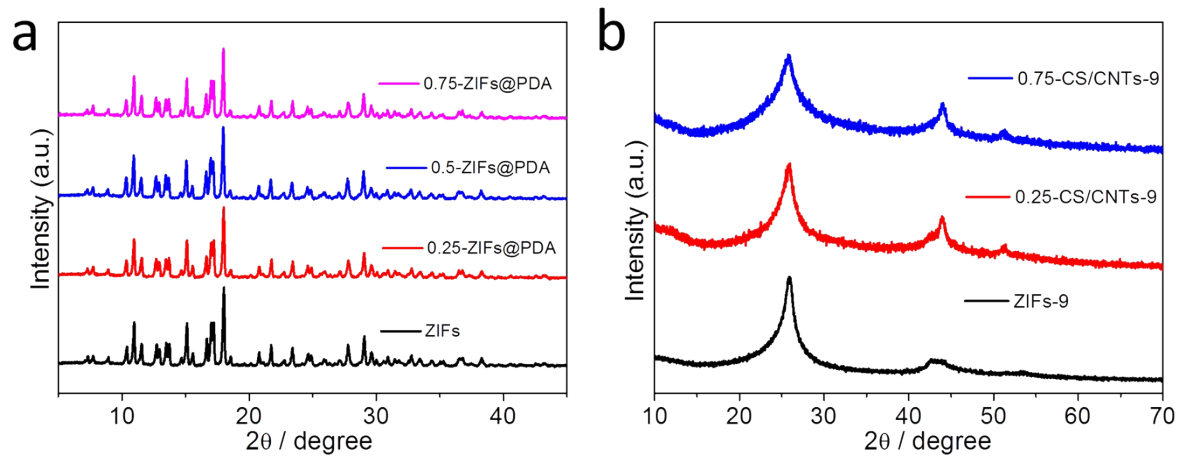

Fig. S2 (a) the powder XRD of precursors ZIFs, 0.25/0.5/0.75-ZIFs@PDA; (b) the powder XRD of carbides ZIFs-9, 0.25/0.75-CS/CNTs-9.

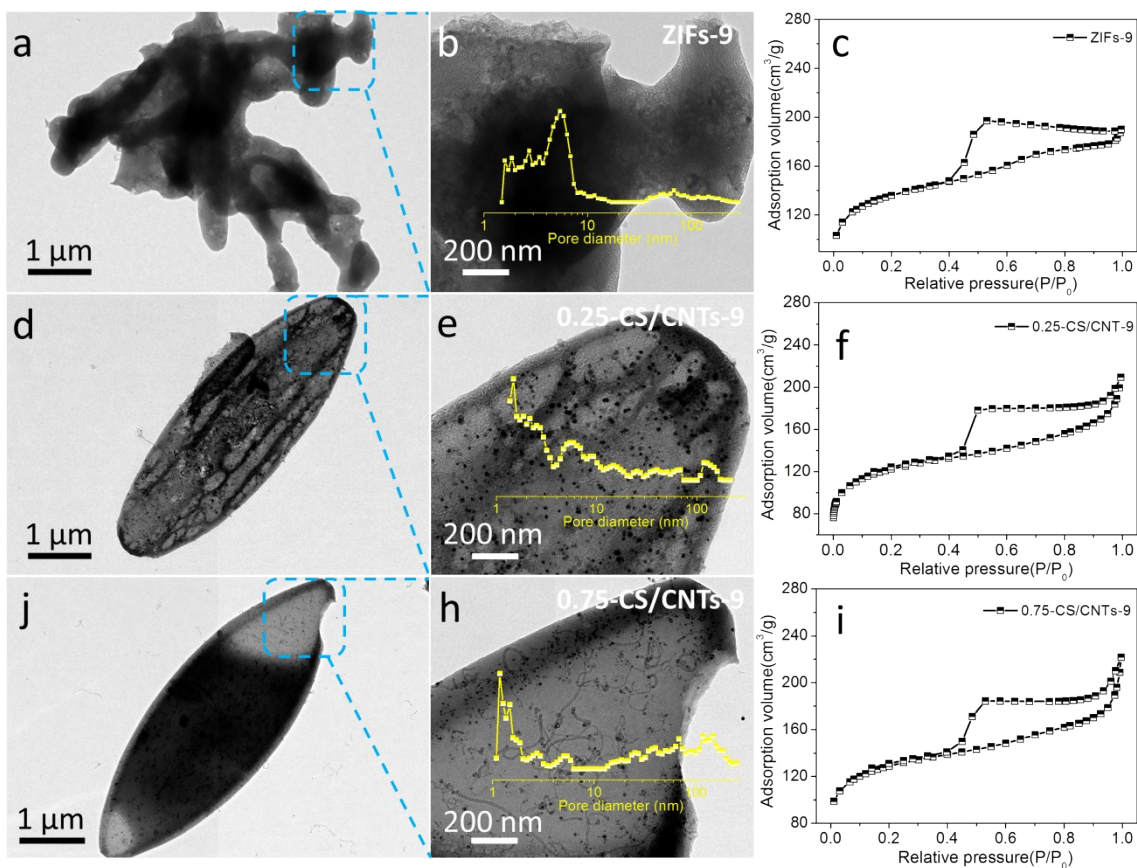

Fig. S3 The TEM (a, d and j), enlarged TEM (b, e and h) images, pore size distribution (inset b, e and h) and N<sub>2</sub>-adsorption and desorption curves (c, f and i) of ZIFs-9, 0.25-CS/CNTs-9 and 0.75-CS/CNTs-9, respectively.

Table S1 The  $S_{BET}$ ,  $V_{pore}$ ,  $V_{micro}$  and the content of different nitrogen species

| <i>Sample</i>  | $S_{BET}$<br>( $m^2g^{-1}$ ) | $V_{pore}$<br>( $cm^3g^{-1}$ ) | $V_{micro}$<br>( $cm^3g^{-1}$ ) | <i>All nitrogen</i><br>(%) | <i>Pyridinic-N</i><br>(%) | <i>Pyrrolic-N</i><br>(%) | <i>Graphitic-N</i><br>(%) |
|----------------|------------------------------|--------------------------------|---------------------------------|----------------------------|---------------------------|--------------------------|---------------------------|
| ZIFs-9         | 472                          | 0.28                           | 0.12                            | 4.68                       | 26.6                      | 18.2                     | 55.1                      |
| 0.25-CS/CNT-9  | 426                          | 0.30                           | 0.10                            | 5.02                       | 31.1                      | 19.8                     | 49.1                      |
| 0.50-CS/CNT-9  | 476                          | 0.34                           | 0.11                            | 5.51                       | 33.4                      | 18.4                     | 48.1                      |
| 0.75-CS/CNT-9  | 448                          | 0.32                           | 0.11                            | 6.48                       | 31.9                      | 20.3                     | 47.8                      |
| 0.50-CS/CNT-7  | 266                          | 0.18                           | 0.09                            | 18.04                      | 56.8                      | 27.4                     | 15.8                      |
| 0.50-CS/CNT-8  | 332                          | 0.27                           | 0.09                            | 11.37                      | 52.3                      | 23.5                     | 24.2                      |
| 0.50-CS/CNT-10 | 347                          | 0.45                           | 0.06                            | 2.17                       | 18.0                      | 16.9                     | 65.1                      |



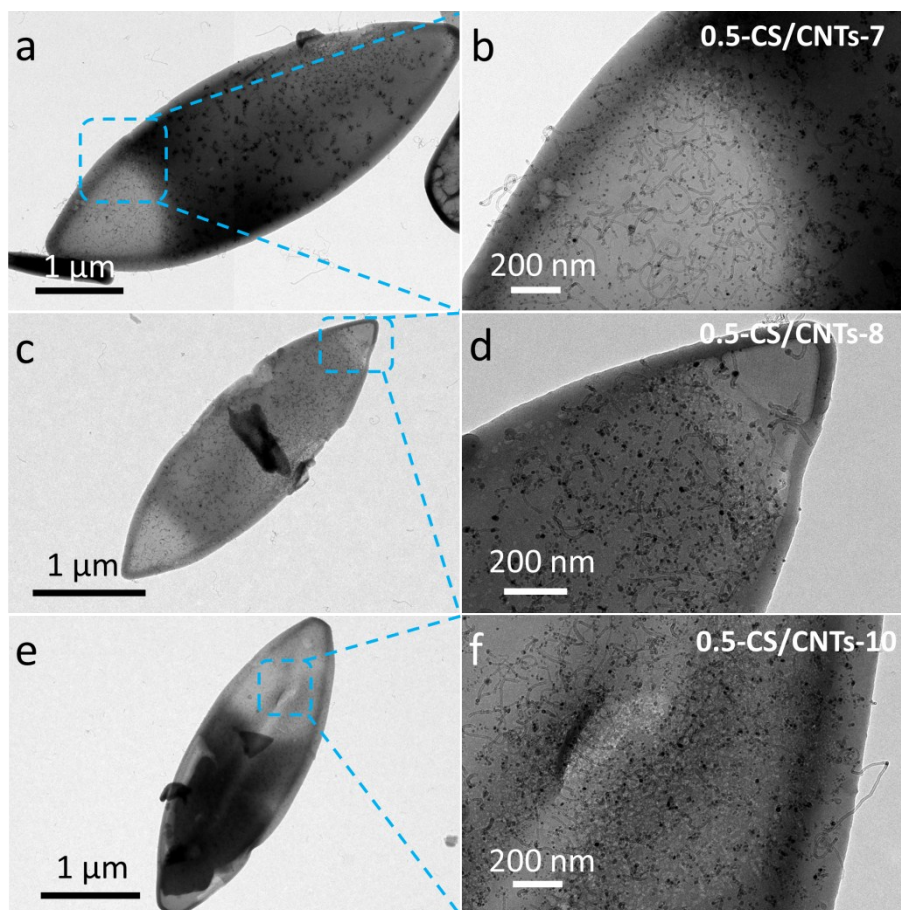

Fig. S4 The TEM (a, c and e) and enlarged TEM (b, d and f) images of 0.5-CS/CNTs-7, 0.5-CS/CNTs-8 and 0.5-CS/CNTs-10, respectively.

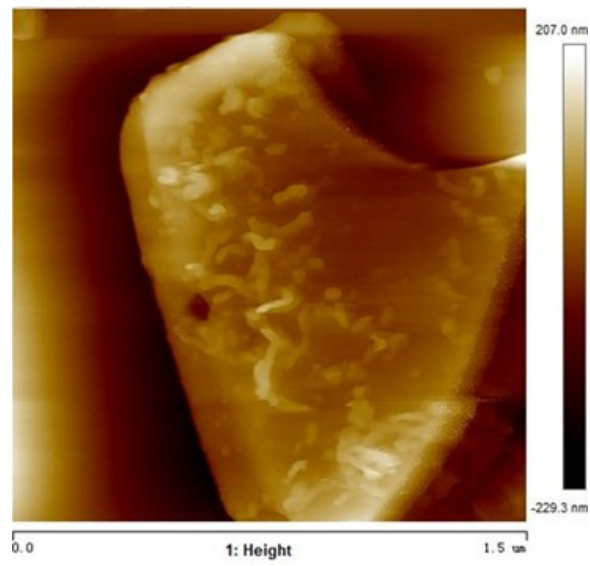

Fig. S5 The AFM image of 0.5-CS/CNTs-9.

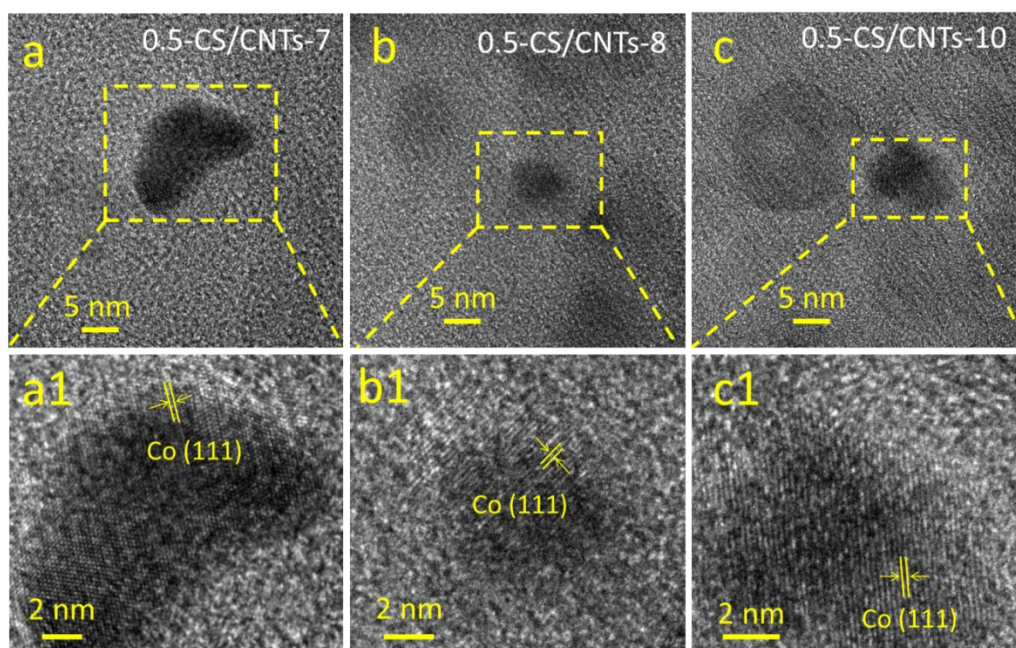

Fig. S6 The HR-TEM images of Co nanoparticle in 0.5-CS/CNT-7/8/10.

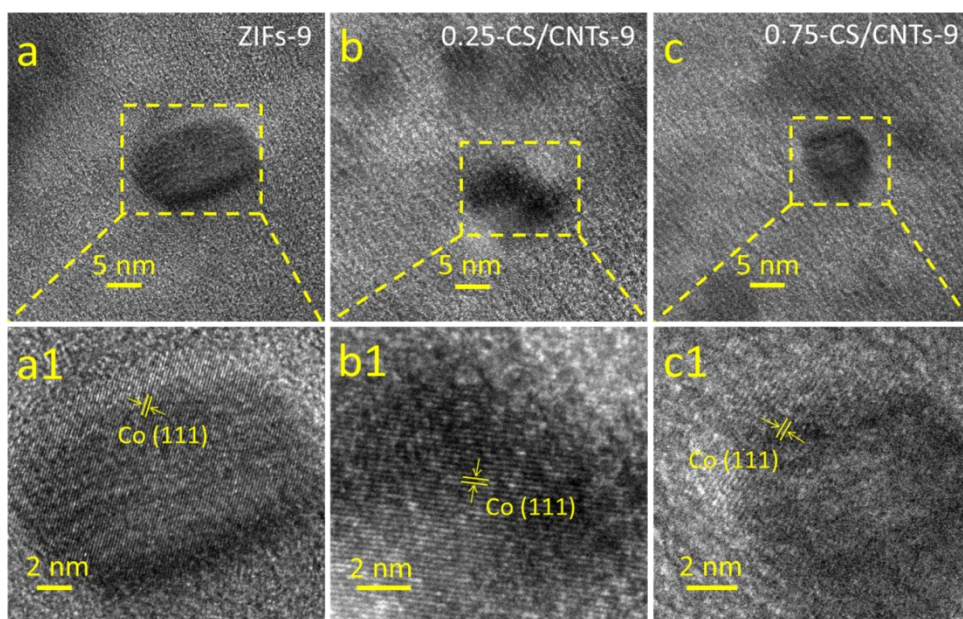

Fig. S7 The HR-TEM images of Co nanoparticle in ZIFs-9 and 0.25/0.75-CS/CNT-9.

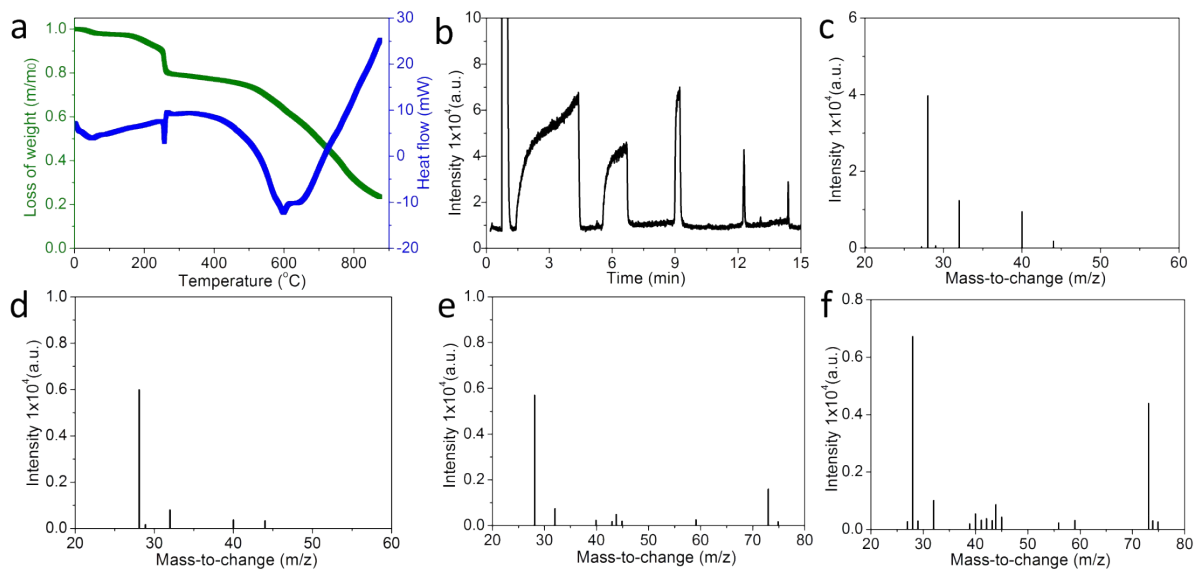

Fig. S8 (a) TGA and heat flow curves of 0.5-ZIFs@PDA in Ar atmosphere; the heating rate is 5 °C/min; (b-f) the GC spectrum and mass spectra of 0.5-ZIFs@PDA .

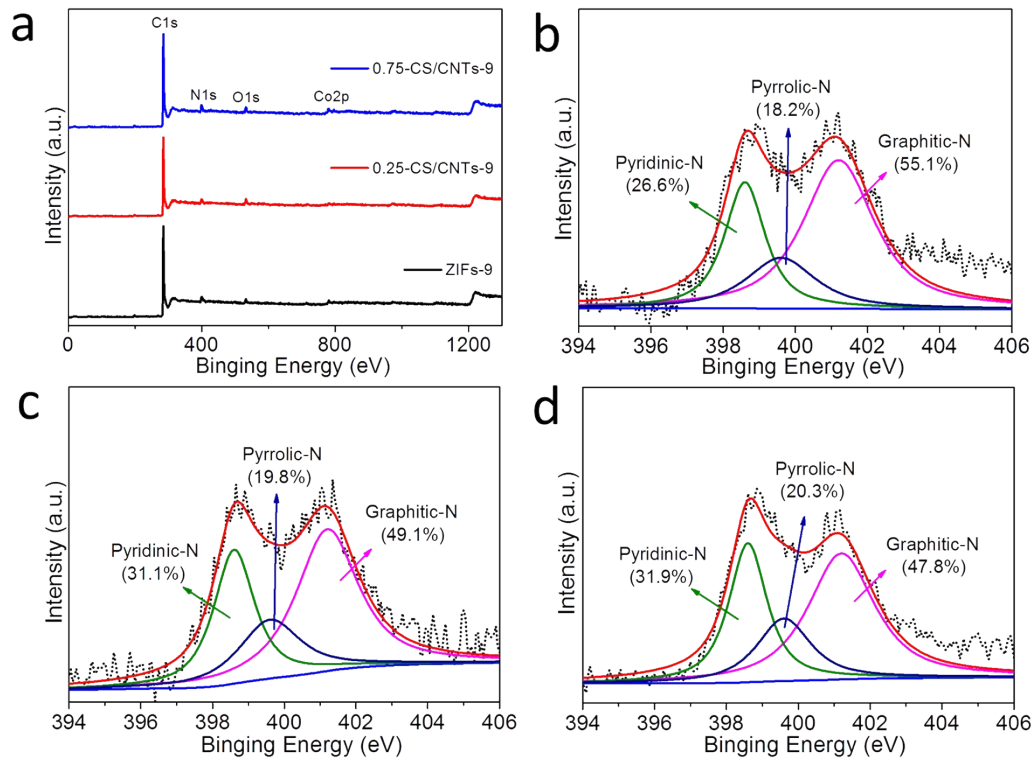

Fig. S9 The wide-range (a) and high-resolution N1s XPS spectra of 0.75-CS/CNTs-9 (b), 0.25-CS/CNTs-9 (c) and ZIFs-9 (d), respectively.

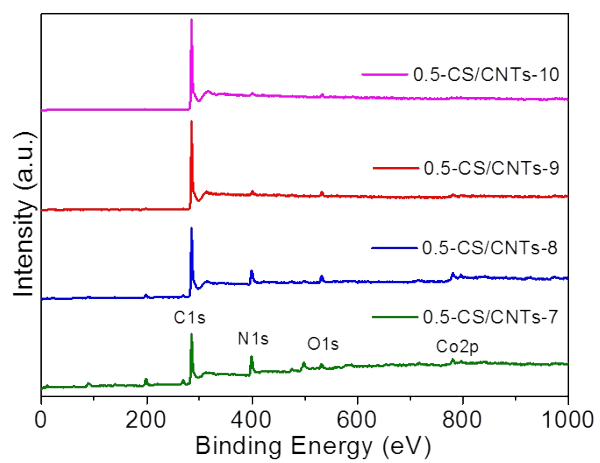

Fig. S10 The wide-range XPS spectra of 0.5-CS/CNTs-7, 0.5-CS/CNTs-8, 0.5-CS/CNTs-9, and 0.5-CS/CNTs-10.

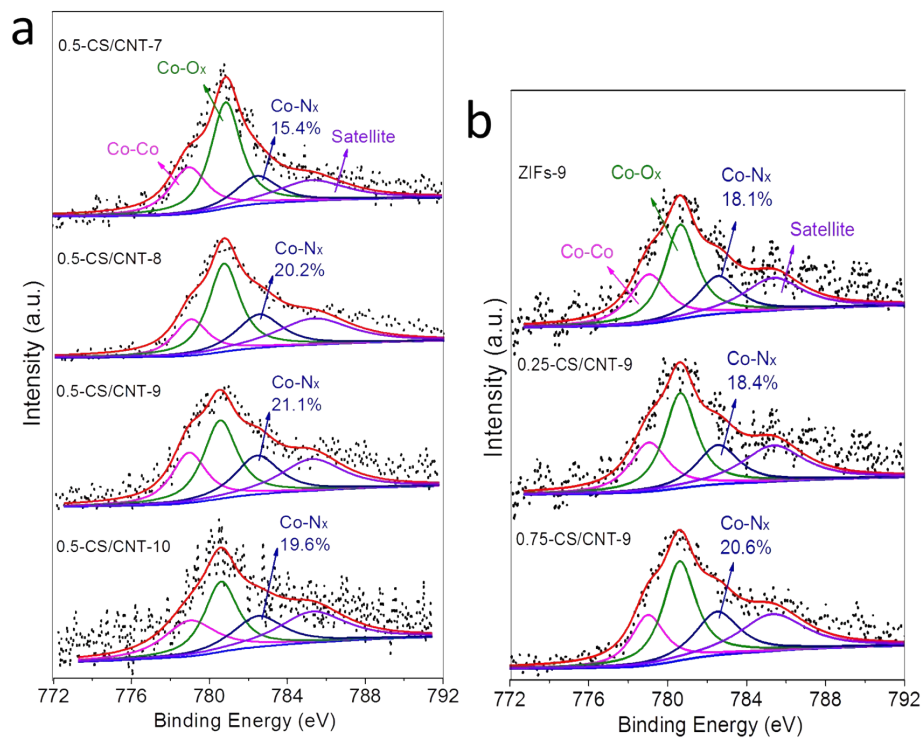

Fig S 11 high-resolution  $\text{Co}_{2p}$  XPS spectra of 0.5-CS/CNTs-7/8/9/10 (a) and ZIFs-9, 0.25/0.75-CS/CNTs-9

(b).



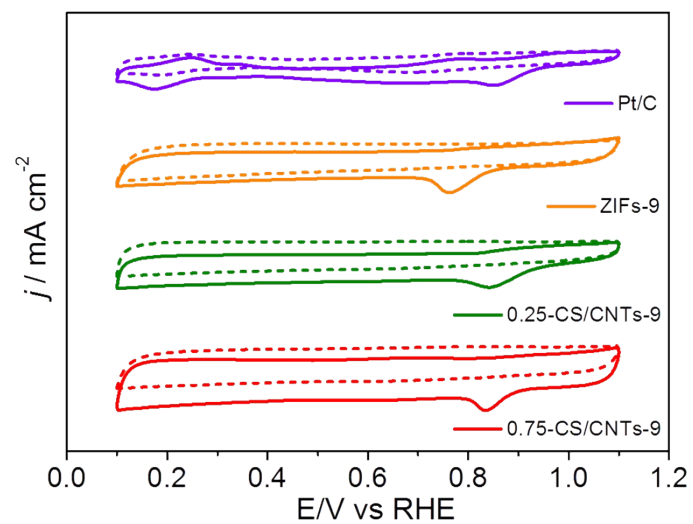

Fig. S12 CVs curves of Pt/C, ZIFs-9, 0.25-CS/CNTs-9 and 0.75-CS/CNTs-9 at a scan rate of 10 mV/s in  $\text{N}_2/\text{O}_2$ -saturated 0.1 M KOH solution

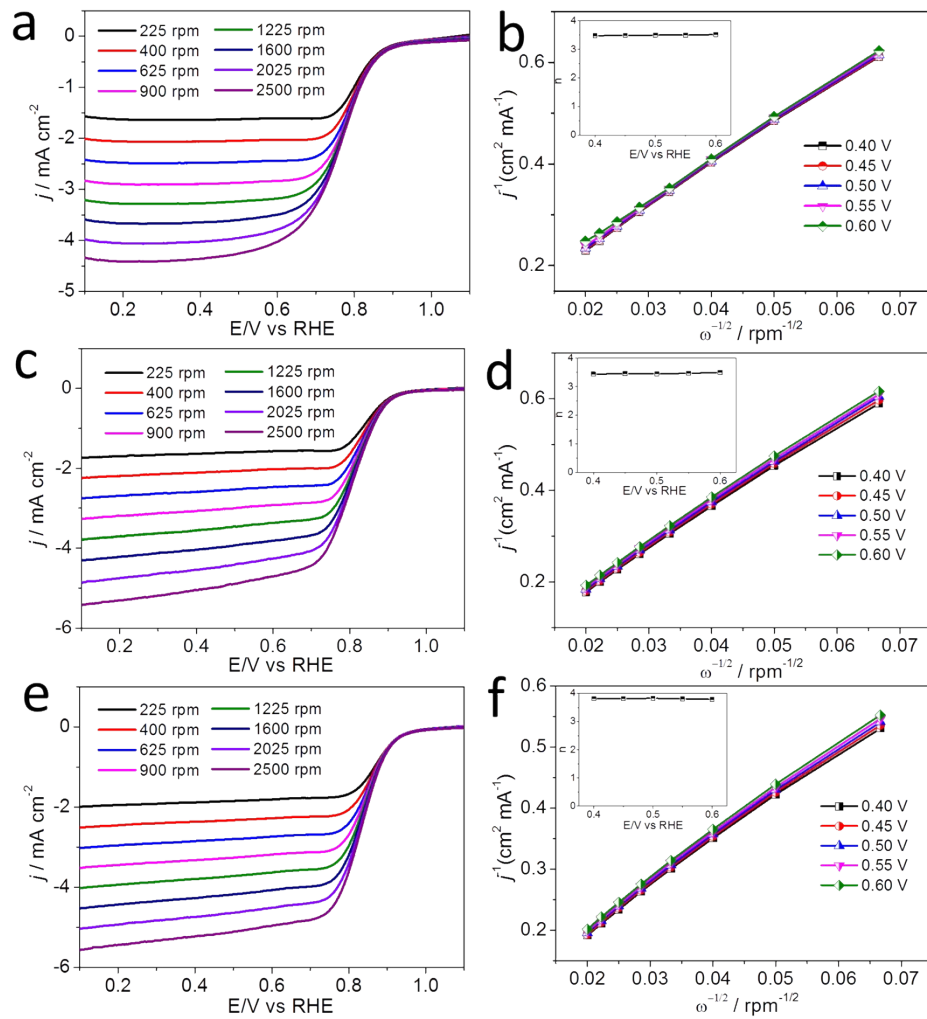

Fig. S13 The different rotation speeds of polarization curves (a, c and e) and K-L plots (b, d and f) of ZIFs-9, 0.25-CS/CNTs-9 and 0.75-CS/CNTs-9, respectively.

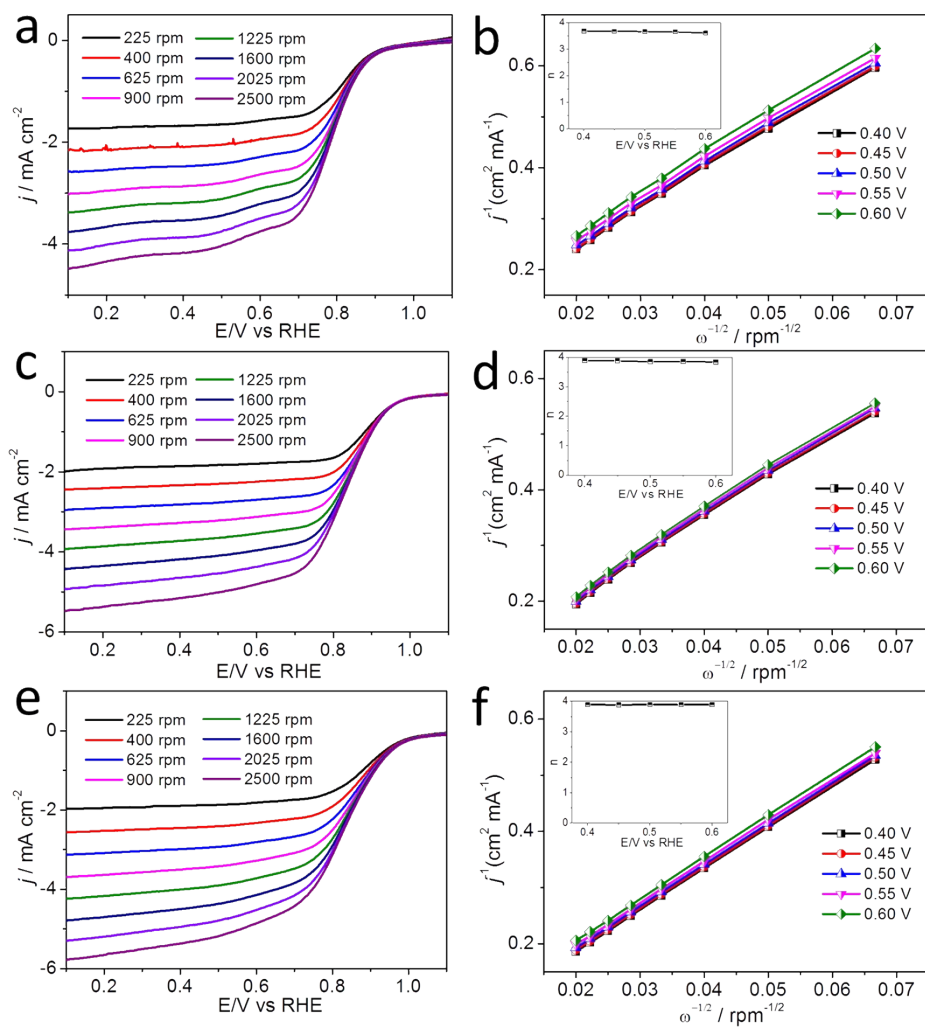

Fig. S14 The different rotation speeds of polarization curves (a, c and e) and K-L plots (b, d and f) of 0.5-CS/CNTs-7, 0.5-CS/CNTs-8 and 0.5-CS/CNTs-10, respectively.

Table. S2 the comparative of ORR performance.

| <b>Catalyst</b> | <b>E<sub>1/2</sub> (V vs. Ag/AgCl)</b><br><b>(Catalyst)</b> | <b>E<sub>1/2</sub> (V vs. Ag/AgCl)</b><br><b>(Pt/C)</b> | <b>Ref.</b> |
|-----------------|-------------------------------------------------------------|---------------------------------------------------------|-------------|
| C-MOF-C2-900    | 0.817                                                       | 0.815                                                   | 1           |
| GSP-1000        | 0.84                                                        | 0.85                                                    | 2           |
| NixCoyO4/Co-NG  | 0.804                                                       | 0.813                                                   | 3           |
| Co-N-C-0.4      | 0.84                                                        | 0.84                                                    | 4           |
| N-CNTs-650      | 0.85                                                        | 0.83                                                    | 5           |
| NC@Co-NGC DSNCs | 0.81                                                        | 0.82                                                    | 6           |
| Fe-N/C-800      | 0.851                                                       | 0.868                                                   | 7           |
| 0.5-CS/CNTs-9   | 0.857                                                       | 0.861                                                   | This work   |

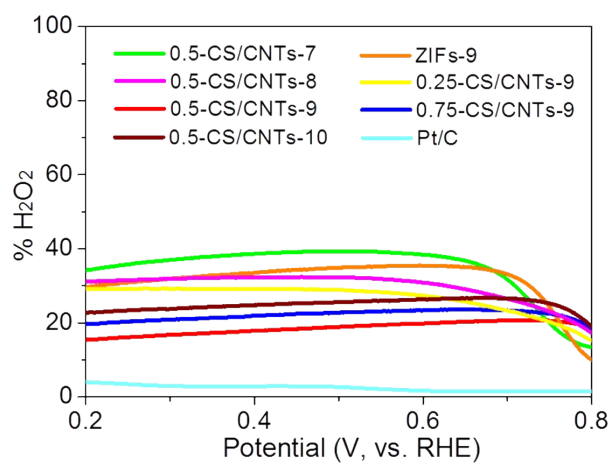

Fig. S15 H<sub>2</sub>O<sub>2</sub> yield of Pt/C, ZIFs-9, 0.5-CS-CNTs-7/8/9/10 and 0.25/0.75-CS/CNTs-9 at various potentials based on RRDE data.

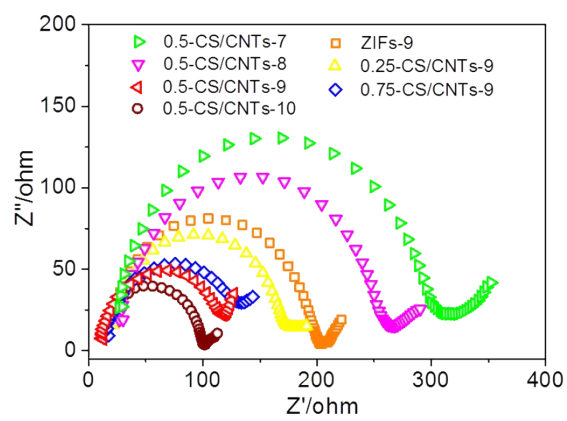

Fig. S16 Nyquist plots of 0.5-CS/CNTs-7/8/9/10, 0.25/0.75-CS/CNTs-9 and ZIFs-9 in the frequency range of 0.01-1000000 Hz.

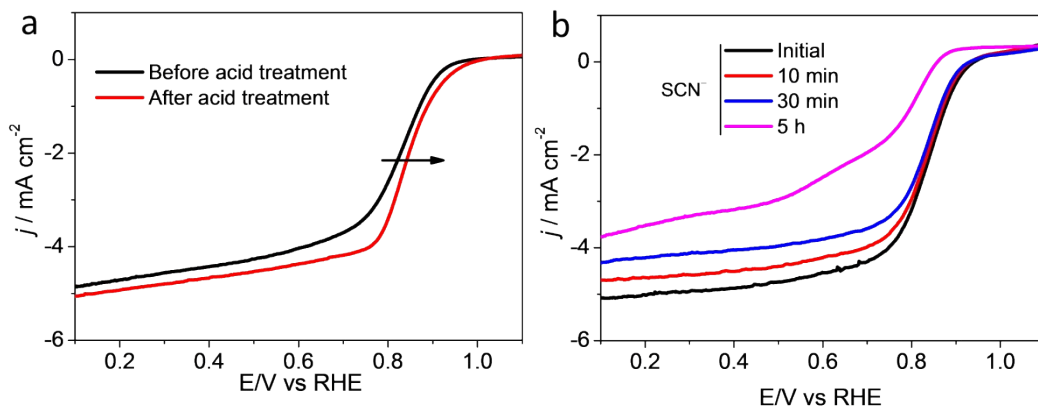

Fig. S17 (a) The LSV curves of as-prepared 0.5-CS/CNTs-9 before and after acid treatment; (b) effect of  $\text{SCN}^-$  ions on ORR performance.

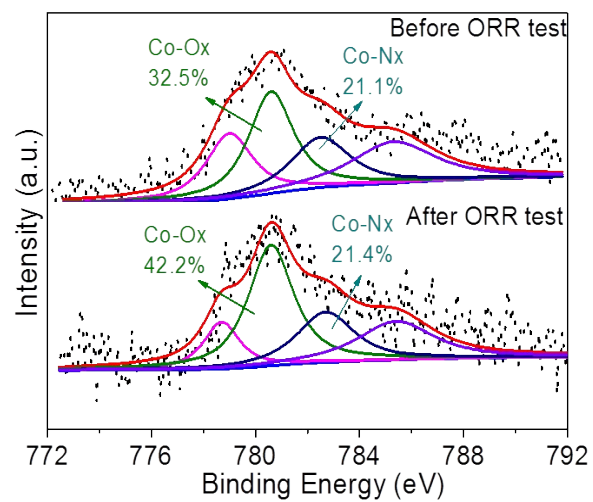

Fig. S18 The high-resolution  $\text{Co}_{2p}$  XPS spectra of 0.5-CS/CNTs-9 before and after ORR test.



## References

1. M. Zhang, Q. Dai, H. Zheng, M. Chen and L. Dai, *Adv. Mater.*, 2018, 1705431.
2. B. Huang, Y. Liu, X. Huang and Z. Xie. *J. Mater. Chem. A*, 2018, **6**, 22277.
3. Y. Hao, Y. Xu, J. Liu and X. Sun, *J. Mater. Chem. A*, 2017, **5**, 5594.
4. E. Hu, J. Ning, B. He, Z. Li, C. Zheng, Y. Zhong, Z. Zhang and Y. Hu, *J. Mater. Chem. A*, 2017, **5**, 2271.
5. J. Meng, C. Niu, L. Xu, J. Li, X. Liu, X. Wang, Y. Wu, X. Xu, W. Chen, Q. Li, Z. Zhu , D. Zhao and L. Mai, *J. Am. Chem. Soc.*, 2017, **139**, 8212.
6. S. Liu, Z. Wang, S. Zhou, F. Yu, M. Yu, C. Y. Chiang, W. Zhou, J. Zhao and J. Qiu, *Adv. Mater.*, 2017, 1700874.
7. L. Lin, Q. Zhu, and A. -W. Xu, *J. Am. Chem. Soc.* 2014, **136**, 11027.
